# Supplementary material for: Highly dispersed and disordered nickel–iron layered hydroxides and sulphides: robust and high-activity water oxidation catalysts
Source: Royal Society of Chemistry journal article supplement (doi:10.1039/c8se00129d), 2018-01-01
Supplement: c8se00129d1.pdf [file c8se00129d1.pdf]

## Supporting Information for:

# Highly-dispersed and disordered nickel-iron layered hydroxides and sulphides: robust and high-activity water oxidation catalysts

Manjunath Chatti,<sup>ab</sup> Alexey M. Glushenkov,<sup>c</sup> Thomas Gengenbach,<sup>d</sup> Gregory P. Knowles,<sup>a</sup>  
Tiago C. Mendes,<sup>a</sup> Amanda V. Ellis,<sup>c</sup> Leone Spiccia,<sup>ab</sup> Rosalie K. Hocking,<sup>e</sup> and  
Alexandr N. Simonov<sup>\*ab</sup>

<sup>a</sup>School of Chemistry and the <sup>b</sup>ARC Centre of Excellence for Electromaterials Science, Monash University, Victoria, 3800, Australia

<sup>c</sup>Department of Chemical Engineering, The University of Melbourne, Parkville, Victoria 3010, Australia

<sup>d</sup>Commonwealth Scientific and Industrial Research Organisation Manufacturing, Clayton, Victoria 3168, Australia

<sup>e</sup>Department of Chemistry and Biotechnology, Swinburne University of Technology, Victoria, 3122, Australia

## TABLE OF CONTENTS

|                                                                                                                                                                             | Page   |
|-----------------------------------------------------------------------------------------------------------------------------------------------------------------------------|--------|
| <b>Table S1.</b> Brief overview of selected transition metal-based catalysts for electrooxidation of water (1 M KOH)                                                        | S2     |
| <b>Supplementary references</b>                                                                                                                                             | S2     |
| <b>Figure S1.</b> XRD patterns of solvothermally and microwave synthesised NiFe-LDH and sulphides                                                                           | S3     |
| <b>Table S2.</b> Conditions explored herein for the synthesis of nickel-iron layered double hydroxides and sulphides.                                                       | S4     |
| <b>Figure S2.</b> UV-Vis absorption spectra                                                                                                                                 | S5     |
| <b>Figure S3.</b> XANES and EXAFS spectra of microwave-synthesised Ni(Fe) layered hydroxides                                                                                | S6     |
| <b>Figure S4.</b> High-resolution O 1s spectra                                                                                                                              | S7     |
| <b>Figure S5.</b> TEM images of microwave-synthesised $\alpha$ -Ni(OH) <sub>2</sub> and NiS <sub>2</sub> .                                                                  | S7     |
| <b>Figure S6.</b> N <sub>2</sub> adsorption-desorption isotherms                                                                                                            | S8     |
| <b>Figure S7.</b> Fe K-edge XANES spectra for microwave-synthesised Ni <sub>0.75</sub> Fe <sub>0.25</sub> S <sub>2+y</sub>                                                  | S9     |
| <b>Figure S8.</b> Comparison of experimental and simulated EXAFS data                                                                                                       | S10    |
| <b>Table S3.</b> EXAFS simulation parameters                                                                                                                                | S10    |
| <b>Figure S9.</b> XRD of microwave-synthesised Ni <sub>0.75</sub> Fe <sub>0.25</sub> S <sub>2+y</sub> after annealing in N <sub>2</sub> atmosphere                          | S11    |
| <b>Figure S10.</b> XPS of microwave-synthesised Ni <sub>0.75</sub> Fe <sub>0.25</sub> S <sub>2+y</sub> after annealing in N <sub>2</sub> atmosphere                         | S11    |
| <b>Figure S11-15.</b> Electrochemical characterisation of microwave synthesised materials                                                                                   | S12-16 |
| <b>Figure S16.</b> SEM images of microwave-synthesised Ni <sub>0.75</sub> Fe <sub>0.25</sub> (OH) <sub>2+x</sub> and Ni <sub>0.75</sub> Fe <sub>0.25</sub> S <sub>2+y</sub> | S17    |
| <b>Figure S17.</b> TEM images of microwave-synthesised Ni <sub>0.75</sub> Fe <sub>0.25</sub> S <sub>2+y</sub> after long-term electrocatalytic test                         | S17    |
| <b>Figure S18.</b> Cyclic voltammograms for microwave-synthesised Ni <sub>0.75</sub> Fe <sub>0.25</sub> S <sub>2+y</sub> immobilised on a Ni foam electrode                 | S18    |
| <b>Figure S19.</b> Cyclic voltammograms for three independent samples of microwave-synthesised Ni <sub>0.75</sub> Fe <sub>0.25</sub> S <sub>2+y</sub>                       | S19    |

**Table S1. Activity of selected transition metal based catalysts for water electrooxidation in 1 M KOH.<sup>a</sup>**

| Catalyst<br>(loading / mg cm <sup>-2</sup> ,<br>electrode)                                        | Synthesis method                         | $A_{\text{BET}} / \text{m}^2 \text{g}^{-1}$ | $\eta_{10}^b / \text{V}$ | $i_{\text{cat}}^c / \text{A g}^{-1}$ |        | $j_{\text{BET}}^c / \text{mA cm}^{-2}$ |        | Ref. |
|---------------------------------------------------------------------------------------------------|------------------------------------------|---------------------------------------------|--------------------------|--------------------------------------|--------|----------------------------------------|--------|------|
|                                                                                                   |                                          |                                             |                          | 0.25 V                               | 0.30 V | 0.25 V                                 | 0.30 V |      |
| Fe <sub>6</sub> Ni <sub>10</sub> O <sub>x</sub><br>(0.1, GC <sup>d</sup> )                        | Aerosol-spraying                         | n.a. <sup>e</sup>                           | 0.286                    | 24                                   | 150    | n.a.                                   | n.a.   | S1   |
| Ni <sub>3</sub> FeN<br>(0.35, GC)                                                                 | Microemulsion and<br>thermal ammonolysis | n.a.                                        | 0.280                    | 28                                   | 57     | n.a.                                   | n.a.   | S2   |
| Gelled-FeCoW<br>(0.21, GC)                                                                        | Ageing and<br>Annealing                  | 94                                          | 0.223                    | 129                                  | n.a.   | 0.14                                   | n.a.   | S3   |
| Co <sub>0.85</sub> Se/Ni <sub>0.9</sub> Fe <sub>0.1</sub><br>(4, G <sub>foam</sub> <sup>f</sup> ) | Multistep<br>hydrothermal                | 156                                         | 0.150                    | 20                                   | 60     | 0.01                                   | 0.04   | S4   |
| RuO <sub>2</sub> (0.05, GC)                                                                       | Multistep thermal<br>decomposition       | 120                                         | 470                      | 7                                    | 10     | 0.006                                  | 0.008  | S5   |
| IrO <sub>2</sub> (0.05, GC)                                                                       | Multistep thermal<br>decomposition       | 71                                          | 450                      | 4                                    | 8      | 0.006                                  | 0.011  | S5   |

<sup>a</sup> All data were reported corrected for ohmic losses. <sup>b</sup> Overpotential required to achieve 10 mA cm<sup>-2</sup><sub>geom.</sub> (normalised to the geometric surface area); derived from quasi-steady-state Tafel plot data (if available) or voltammograms. <sup>c</sup> Current density normalised to the catalyst mass (*i*) or BET surface area (*j*) at  $\eta = 0.25$  and 0.30 V. <sup>d</sup> Glassy carbon. <sup>e</sup> Not available. <sup>f</sup> Graphene foam.

## SUPPLEMENTARY REFERENCES

- S1. L. Kuai, J. Geng, C. Chen, E. Kan, Y. Liu, Q. Wang and B. Geng, *Angew. Chem. Int. Ed.*, 2014, **126**, 7677-7681.
- S2. X. Jia, Y. Zhao, G. Chen, L. Shang, R. Shi, X. Kang, G. I. N. Waterhouse, L.-Z. Wu, C.-H. Tung and T. Zhang, *Adv. Energy Mater.*, 2016, **6**, 1502585-n/a.
- S3. B. Zhang, X. Zheng, O. Voznyy, R. Comin, M. Bajdich, M. García-Melchor, L. Han, J. Xu, M. Liu, L. Zheng, F. P. García de Arquer, C. T. Dinh, F. Fan, M. Yuan, E. Yassitepe, N. Chen, T. Regier, P. Liu, Y. Li, P. De Luna, A. Janmohamed, H. L. Xin, H. Yang, A. Vojvodic and E. H. Sargent, *Science*, 2016, **352**, 333-337.
- S4. Y. Hou, M. R. Lohe, J. Zhang, S. Liu, X. Zhuang and X. Feng, *Energy Environ. Sci.*, 2016, **9**, 478-483.
- S5. Y. Lee, J. Suntivich, K. J. May, E. E. Perry and Y. Shao-Horn, *J. Phys. Chem. Lett.*, 2012, **3**, 399-404.

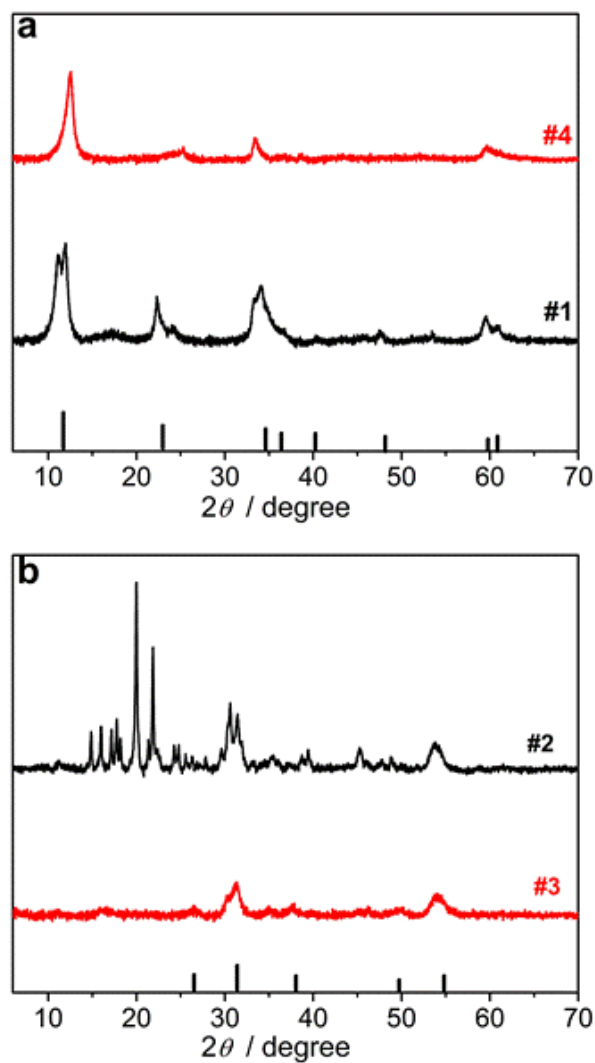

**Figure S1.** X-ray diffraction patterns of (a)  $\text{Ni}_{0.9}\text{Fe}_{0.1}$  hydroxides and (b) materials obtained during sulphidation of these hydroxides following the procedures #1-4 summarised in Table S2. Vertical lines show the tabulated positions and relative intensities for (a)  $\text{Ni}_{0.9}\text{Fe}_{0.1}$  LDH (JCPDS# 38-0715) and (b)  $\text{Ni}_{0.75}\text{Fe}_{0.25}\text{S}_2$  (PDF#11-0099).

**Table S2. Conditions explored herein for the synthesis of nickel-iron layered double hydroxides and sulphides.**

| #              | Material                                       | Synthesis Method | Precursors                                                                         | Reaction parameters |       |         | Layer stability             |
|----------------|------------------------------------------------|------------------|------------------------------------------------------------------------------------|---------------------|-------|---------|-----------------------------|
|                |                                                |                  |                                                                                    | Temperature / °C    | Time  | Solvent |                             |
| 1 <sup>a</sup> | Ni <sub>0.9</sub> Fe <sub>0.1</sub> LDH        | Hydrothermal     | NiCl <sub>2</sub> , Fe(NO <sub>3</sub> ) <sub>3</sub><br>Urea<br>Trisodium citrate | 150                 | 24 h  | Water   | Stable                      |
| 2 <sup>a</sup> | Ni <sub>0.9</sub> Fe <sub>0.1</sub> sulphide   | Solvothermal     | Ni <sub>0.9</sub> Fe <sub>0.1</sub> LDH #1<br>Thioacetamide                        | 120                 | 6 h   | Ethanol | <b>Sulphides not formed</b> |
| 3              | Ni <sub>0.9</sub> Fe <sub>0.1</sub> sulphide   | Microwave        | NiFe LDHs #1<br>Thioacetamide                                                      | 150                 | 0.5 h | Ethanol | Unstable                    |
| 4              | Ni <sub>0.9</sub> Fe <sub>0.1</sub> LDH        | Microwave        | NiCl <sub>2</sub> , Fe(NO <sub>3</sub> ) <sub>3</sub><br>Urea<br>Trisodium citrate | 180                 | 1 h   | Water   | Unstable                    |
| 5              | Ni <sub>0.9</sub> Fe <sub>0.1</sub> sulphide   | Microwave        | NiFe LDH #4<br>Thioacetamide                                                       | 120-180             | 0.5 h | Ethanol | Unstable                    |
| 6              | Ni(OH) <sub>2</sub>                            | Microwave        | Ni(CH <sub>3</sub> COO) <sub>2</sub><br>Urea                                       | 120                 | 1 h   | Water   | Stable                      |
| 7              | NiS <sub>2</sub>                               | Microwave        | Ni(OH) <sub>2</sub> #6<br>Thioacetamide                                            | 150                 | 0.5 h | Ethanol | Stable                      |
| 8              | Ni <sub>0.75</sub> Fe <sub>0.25</sub> LDH      | Microwave        | Ni(CH <sub>3</sub> COO) <sub>2</sub><br>Fe(NO <sub>3</sub> ) <sub>3</sub><br>Urea  | 120 °C              | 1 h   | Water   | Stable                      |
| 9              | Ni <sub>0.75</sub> Fe <sub>0.25</sub> sulphide | Microwave        | NiFe-LDH #8<br>Thioacetamide                                                       | 120-180 °C          | 0.5 h | Ethanol | Stable                      |

<sup>a</sup> Synthesis procedure as in Long *et al. J. Am. Chem. Soc.* **2015**, 137, 11900–11903.

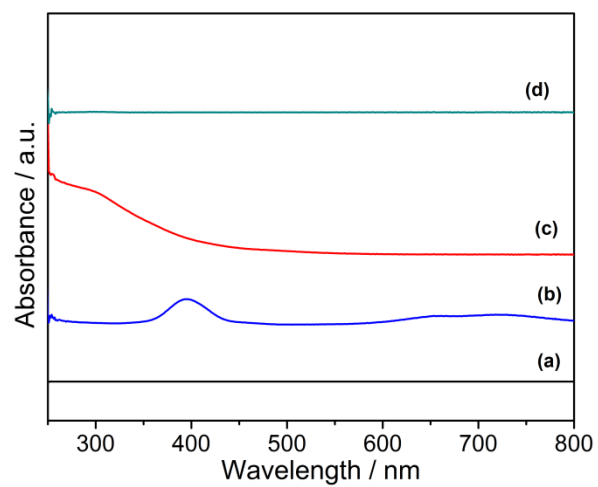

**Figure S2.** UV-Vis absorption spectra of (a) Milli-Q-purified water, (b) 75 mM  $\text{Ni}(\text{CH}_3\text{COO})_2$  in  $\text{H}_2\text{O}$ , (c) 25 mM  $\text{Fe}(\text{NO}_3)_3$  in  $\text{H}_2\text{O}$ , and (d) supernatant solution after microwave synthesis of  $\text{Ni}_{0.75}\text{Fe}_{0.25}(\text{OH})_{2+x}$ .

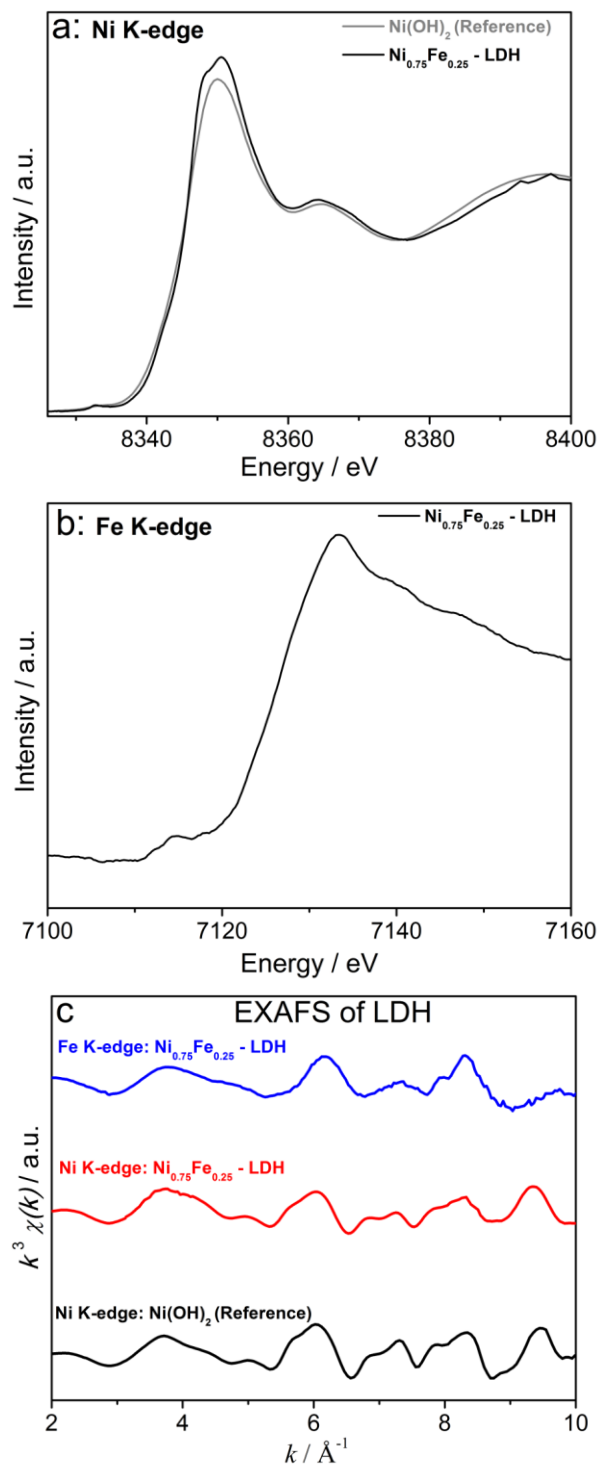

**Figure S3.** XAS characterisation of  $\text{Ni}_{0.75}\text{Fe}_{0.25}(\text{OH})_{2+x}$ : (a) Ni K-edge XANES, (b) Fe K-edge XANES, (c) Fe (blue) and Ni (red) K-edge EXAFS. Grey traces show spectra for the  $\text{Ni}(\text{OH})_2$  reference material.

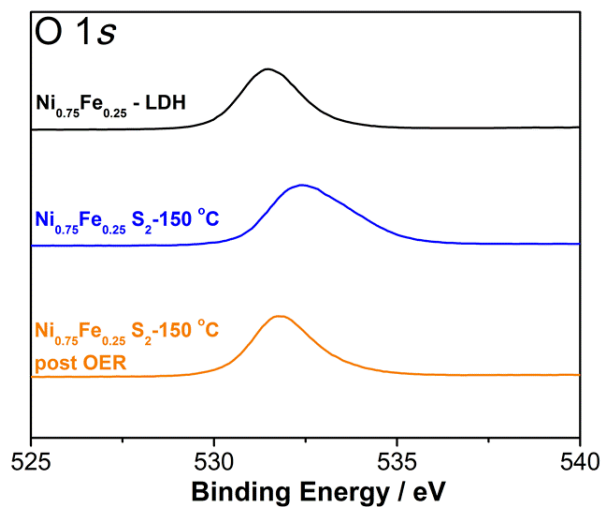

**Figure S4.** High-resolution O 1s spectra for microwave-synthesised  $\text{Ni}_{0.75}\text{Fe}_{0.25}(\text{OH})_{2+x}$  (*black*) and  $\text{Ni}_{0.75}\text{Fe}_{0.25}\text{S}_2$  (synthesised at 150°C) that was freshly prepared (*blue*) or used to catalyse the OER at  $10 \text{ mA cm}^{-2}_{\text{geom.}}$  for 12 h at 25 °C (*orange*).

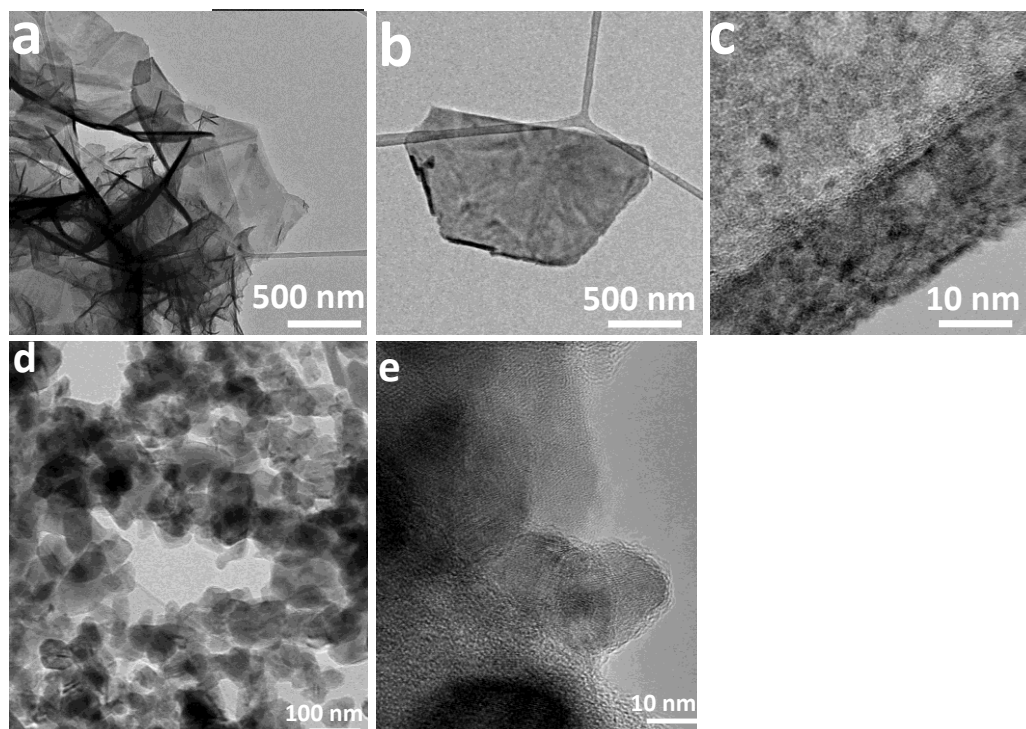

**Figure S5.** TEM images of microwave-synthesised (a-c)  $\alpha\text{-Ni}(\text{OH})_2$  and (d-e)  $\text{NiS}_2$ .



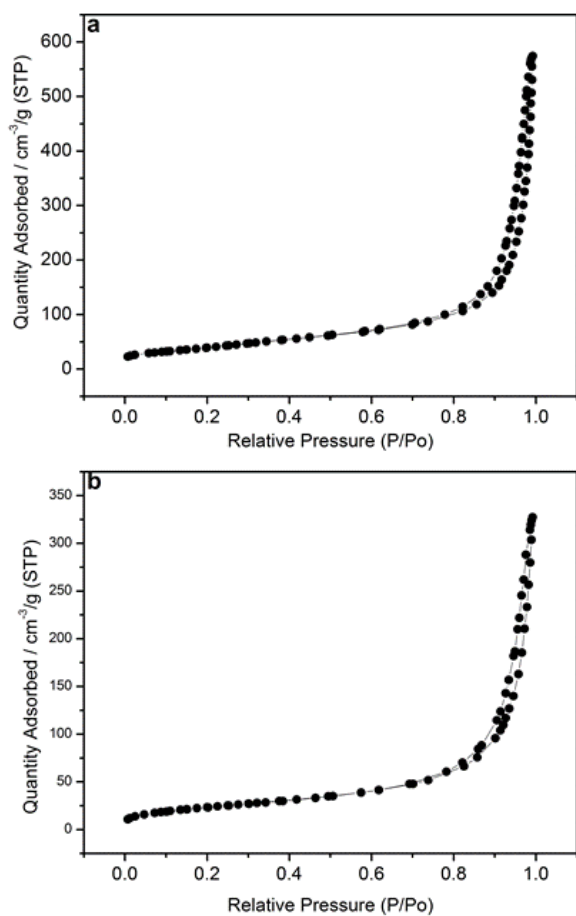

**Figure S6.** N<sub>2</sub> adsorption-desorption isotherms of microwave-synthesised (a)  $\text{Ni}_{0.75}\text{Fe}_{0.25}(\text{OH})_{2+x}$  and (b)  $\text{Ni}_{0.75}\text{Fe}_{0.25}\text{S}_{2+y}$  (obtained at 150°C).

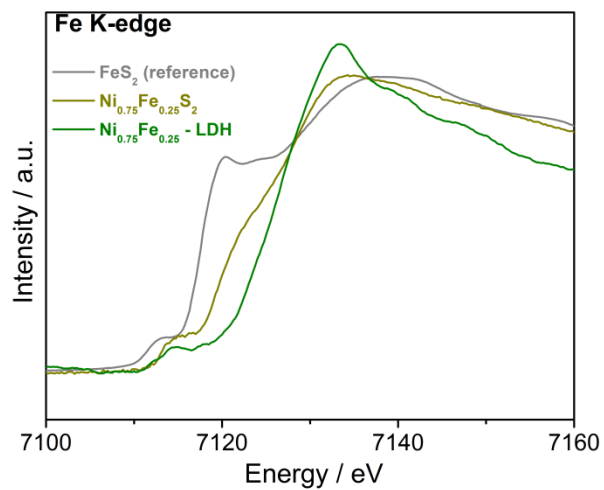

**Figure S7.** Fe K-edge XANES spectra of microwave-synthesized  $\text{Ni}_{0.75}\text{Fe}_{0.25}(\text{OH})_{2+x}$  (*green*) and  $\text{Ni}_{0.75}\text{Fe}_{0.25}\text{S}_{2+y}$  (obtained at 150 °C) (*tan*). *Grey* trace shows spectra for the  $\text{FeS}_2$  reference.

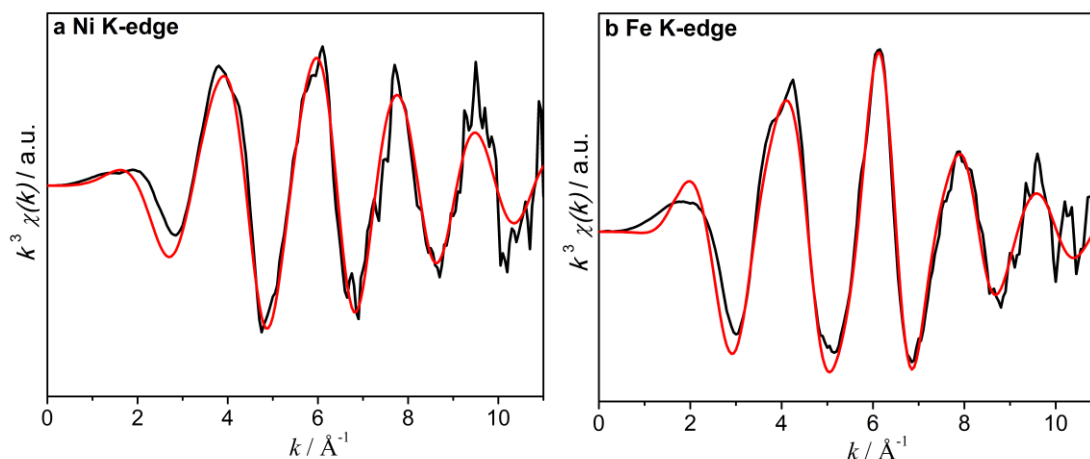

**Figure S8.** Comparison of experimental (*black*) and simulated (*red*) EXAFS data for microwave-synthesised  $\text{Ni}_{0.75}\text{Fe}_{0.25}\text{S}_{2+y}$  (150 °C): (a) Ni K-edge; (b) Fe K-edge. Simulations are based on pyrite structure and parameters in Table S3.

**Table S3. Parameters used in EXAFS simulations shown in Figure S8.**

|                            | $N^a$ | $S02^b$ | $\sigma^2 / \text{\AA}^2^c$ | $E0 / \text{eV}$ | $R / \text{\AA}^e$ | $\text{Re (crystal str)} / \text{\AA}^f$ |
|----------------------------|-------|---------|-----------------------------|------------------|--------------------|------------------------------------------|
| Fe-S                       | 6     | 0.673   | 0.01428                     | -14.495          | 2.216              | 2.39                                     |
| Fe-S (2)                   | 6     | 0.673   | 0.02647                     | -14.495          | 3.1417             | 3.52                                     |
| Fe-Ni                      | 12    | 0.673   | 0.02903                     | -14.495          | 3.859              | 4.00                                     |
| Reduced chi-square: 392.67 |       |         |                             |                  |                    |                                          |
| R-factor 0.003             |       |         |                             |                  |                    |                                          |
| Ni-S                       | 6     | 1.27    | 0.01104                     | -21.097          | 2.211              | 2.39                                     |
| Ni-S (2)                   | 6     | 1.27    | 0.04664                     | -21.097          | 3.0513             | 3.52                                     |
| Ni-Ni                      | 12    | 1.27    | 0.0312                      | -21.097          | 3.790              | 4.00                                     |
| Reduced chi-square 248.63  |       |         |                             |                  |                    |                                          |
| R-factor 0.008             |       |         |                             |                  |                    |                                          |

<sup>a</sup> Coordination number; <sup>b</sup> Amplitude reduction parameter; <sup>c</sup> Debye-Waller parameter; <sup>d</sup> Binding energy; <sup>e</sup> Interatomic distance; <sup>f</sup> Distance from the crystal structure data.

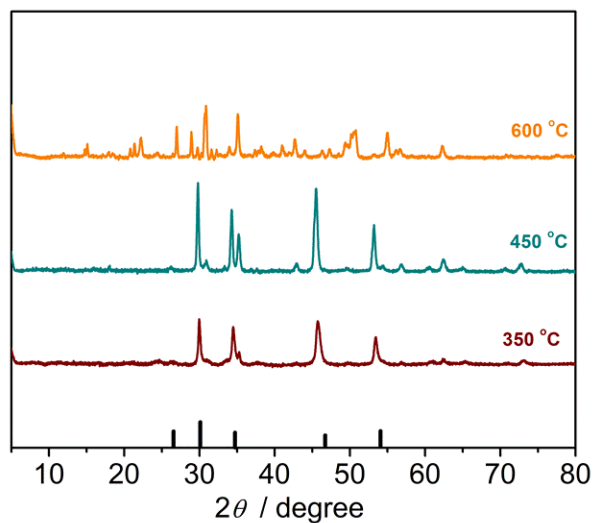

**Figure S9.** XRD patterns of  $\text{Ni}_{0.75}\text{Fe}_{0.25}\text{S}_2$  (150 °C) after annealing in  $\text{N}_2$  atmosphere at different temperatures: 350 (wine), 450 (cyan), and 600 °C (orange).

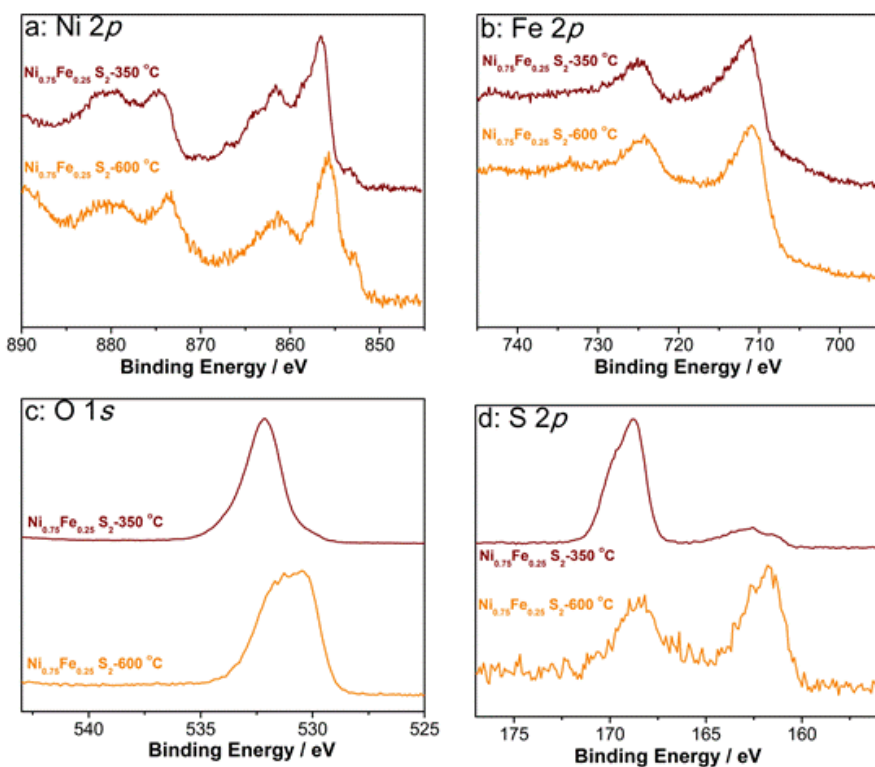

**Figure S10.** High-resolution (a) Ni 2p, (b) Fe 2p, (c) O 1s, and (d) S 2p spectra for  $\text{Ni}_{0.75}\text{Fe}_{0.25}\text{S}_{2+y}$  (synthesised at 150 °C) and annealed at 350 (wine) and 600 °C (orange).

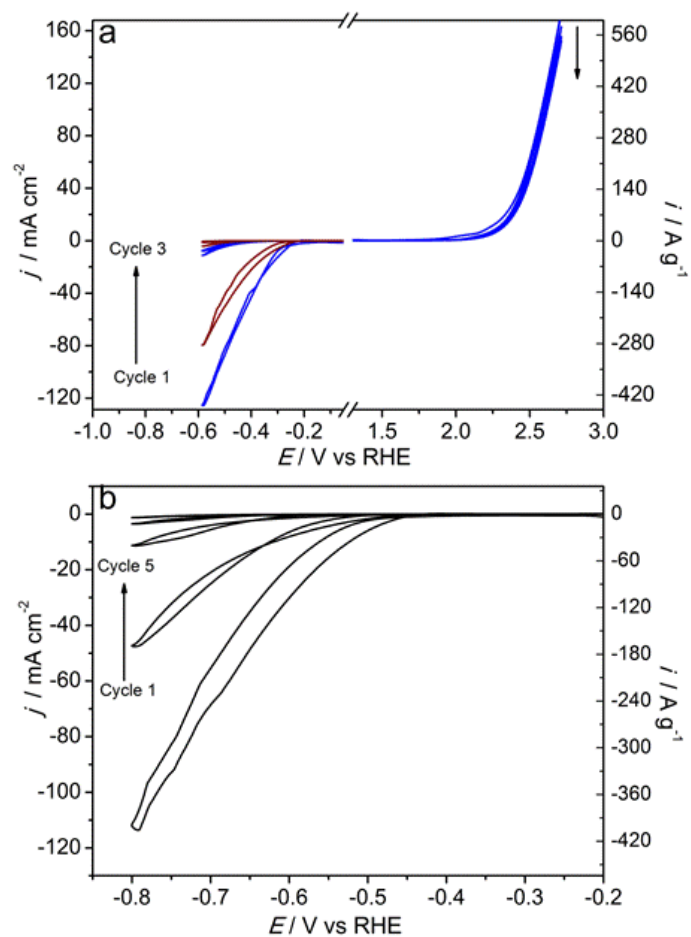

**Figure S11.** Electrocatalytic activity of the microwave-synthesised ( $150^\circ\text{C}$ ) materials in stirred aqueous  $0.5\text{ M H}_2\text{SO}_4$ : (a) HER and OER voltammetric profiles for as-synthesised  $\text{Ni}_{0.75}\text{Fe}_{0.25}\text{S}_{2+y}$  (*blue*), and  $\text{Ni}_{0.75}\text{Fe}_{0.25}\text{S}_{2+y}$  annealed at  $350^\circ\text{C}$  in the  $\text{N}_2$  atmosphere (*wine*); (b) HER voltammetric profile for  $\text{NiS}_2$ . Data for the HER and OER were obtained in  $\text{N}_2$ - and air-saturated solutions, respectively. Currents are normalised to the geometric surface area of the electrodes and mass of the catalysts. Catalyst loading was  $0.28\text{ mg cm}^{-2}$ .

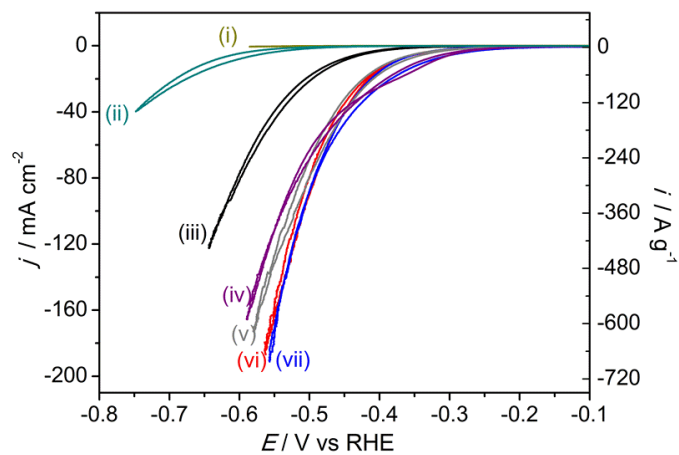

**Figure S12.** Cyclic voltammograms (scan rate  $0.005 \text{ V s}^{-1}$ ) for reduction of stirred aqueous  $1 \text{ M KOH}$  using a glassy carbon electrode that was (i) unmodified, or coated with  $0.28 \text{ mg cm}^{-2}$  of microwave-synthesised (ii)  $\alpha\text{-Ni(OH)}_2$ , (iii)  $\text{Ni}_{0.75}\text{Fe}_{0.25}(\text{OH})_{2+x}$ , (iv)  $\text{NiS}_2$  or  $\text{Ni}_{0.75}\text{Fe}_{0.25}\text{S}_2$  produced at (v)  $120^\circ\text{C}$ , (vi)  $180^\circ\text{C}$  or (vii)  $150^\circ\text{C}$ . Data were post-corrected for the  $IR_u$  drop ( $R_u = 15\text{-}18 \Omega$ ).

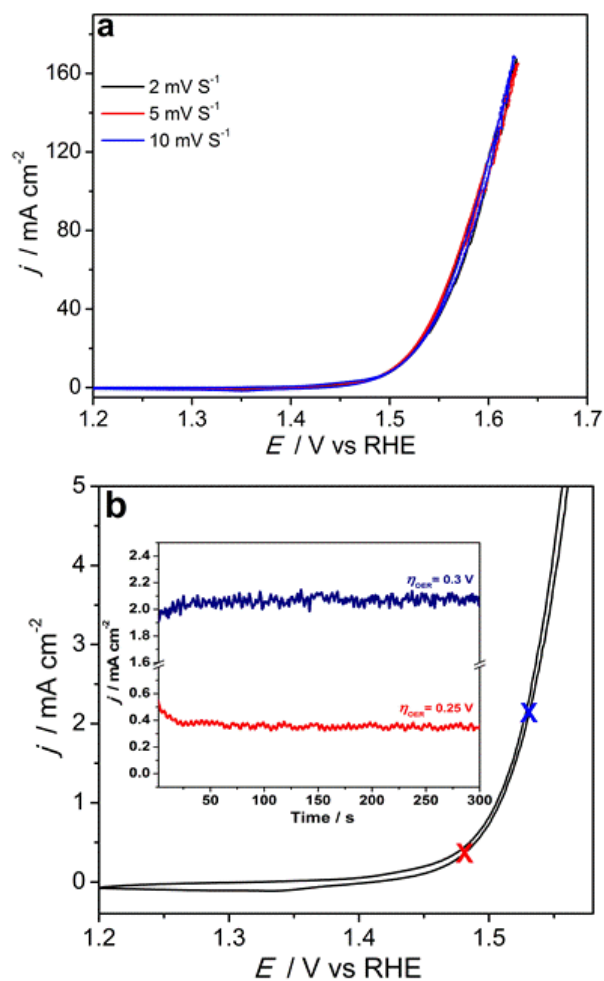

**Figure S13.** Electrooxidation of stirred aqueous 1 M KOH using a glassy carbon electrode functionalised with microwave-synthesised  $\text{Ni}_{0.75}\text{Fe}_{0.25}\text{S}_{2+y}$  (obtained at 150°C): (a) effect of scan rate (black-0.002 V s<sup>-1</sup>; red-0.005 V s<sup>-1</sup>; blue-0.010 V s<sup>-1</sup>) on cyclic voltammograms for catalyst loading 0.28 mg cm<sup>-2</sup> (data were post-corrected for the  $IR_u$  drop;  $R_u = 15 \Omega$ ); (b) comparison of cyclic voltammogram (scan rate 0.005 V s<sup>-1</sup>) with quasi-steady-state current densities derived from chronoamperograms recorded at 0.25 (x) and 0.30 V (x) OER overpotential for catalyst loading 0.03 mg cm<sup>-2</sup> ( $j$ - $t$  transients are shown in the inset).

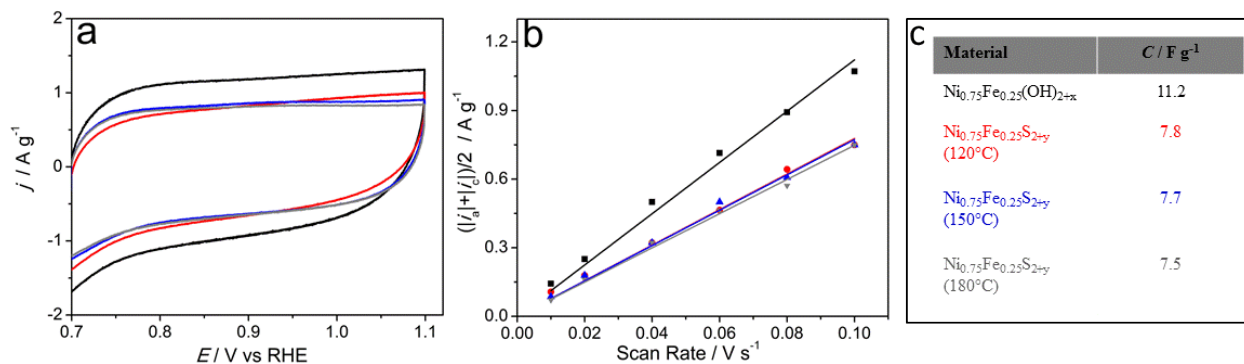

**Figure S14.** (a) Cyclic voltammograms (scan rate  $0.100 \text{ V s}^{-1}$ ) of microwave-synthesised  $\text{Ni}_{0.75}\text{Fe}_{0.25}(\text{OH})_{2+x}$  (*black*) and  $\text{Ni}_{0.75}\text{Fe}_{0.25}\text{S}_{2+y}$  (obtained at 120 (*red*), 150 (*blue*) and 180 °C (*grey*)) within the potential range devoid of significant faradaic processes. Catalysts were immobilised on a glassy-carbon electrode at  $\Gamma = 0.28 \text{ mg cm}^{-2}$ . Electrolyte solution: quiescent aqueous 1 M KOH. Currents are normalised to the catalyst mass. (b) Dependence of the simple average of the anodic and cathodic current densities at 0.9 V vs. RHE derived from cyclic voltammograms as those exemplified in panel a on a potential scan rate. Solid lines are linear fits to the experimental data. (c) Specific capacitance derived from the data in panel b.



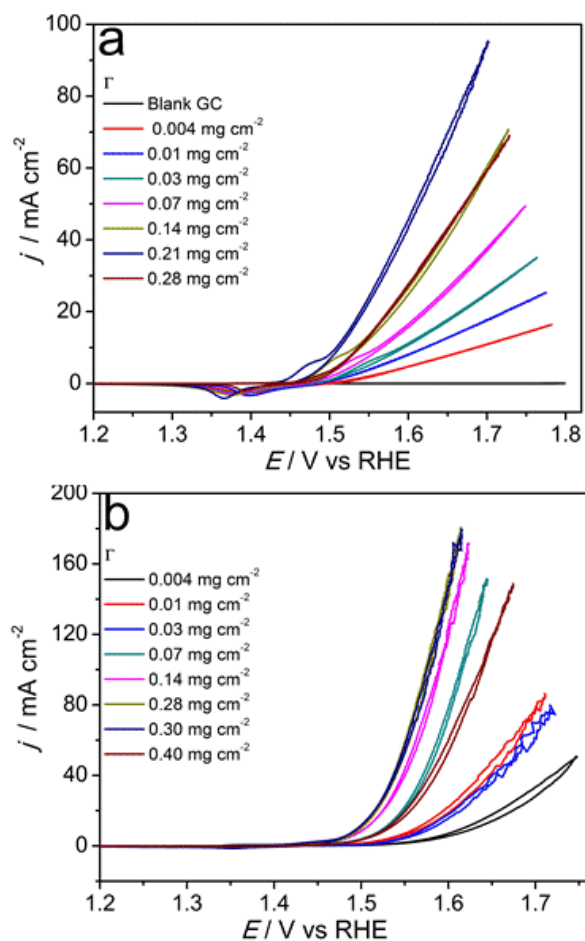

**Figure S15.** Effects of catalyst loading ( $\Gamma$ ) on cyclic voltammograms (scan rate 0.005 V s<sup>-1</sup>) obtained for glassy-carbon electrodes functionalised with microwave-synthesised (a)  $\text{Ni}_{0.75}\text{Fe}_{0.25}(\text{OH})_{2+x}$  and (b)  $\text{Ni}_{0.75}\text{Fe}_{0.25}\text{S}_{2+y}$  (synthesis temperature 150°C) in contact with stirred aqueous 1 M KOH. Currents are normalised to the geometric surface area of the electrode. Data were post-corrected for the  $IR_u$ -drop ( $R_u = 13\text{-}15\ \Omega$ ).

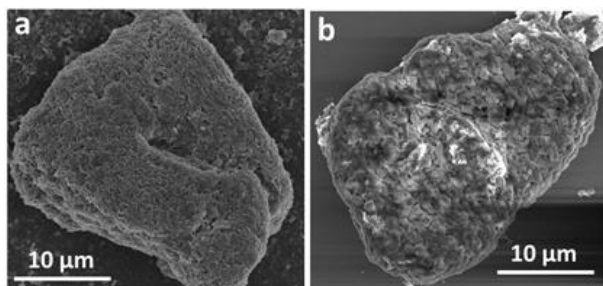

**Figure S16.** SEM images of microwave-synthesised (a)  $\text{Ni}_{0.75}\text{Fe}_{0.25}(\text{OH})_{2+x}$  and (b)  $\text{Ni}_{0.75}\text{Fe}_{0.25}\text{S}_{2+y}$  (obtained at 150°C). Samples were drop-cast on a flat silicon support.

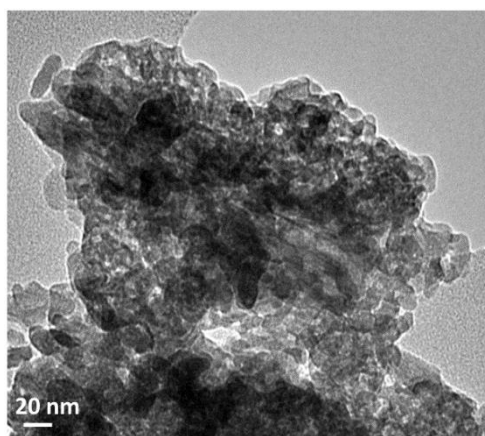

**Figure S17.** TEM image of the  $\text{Ni}_{0.75}\text{Fe}_{0.25}\text{S}_{2+y}$  material synthesised under microwave conditions at 150 °C that was used as an electrocatalyst for electrooxidation of stirred aqueous 1 M KOH for 12 h at 1.5 V vs. RHE at 25 °C (chronoamperogram shown in Figure 7a of the main text).

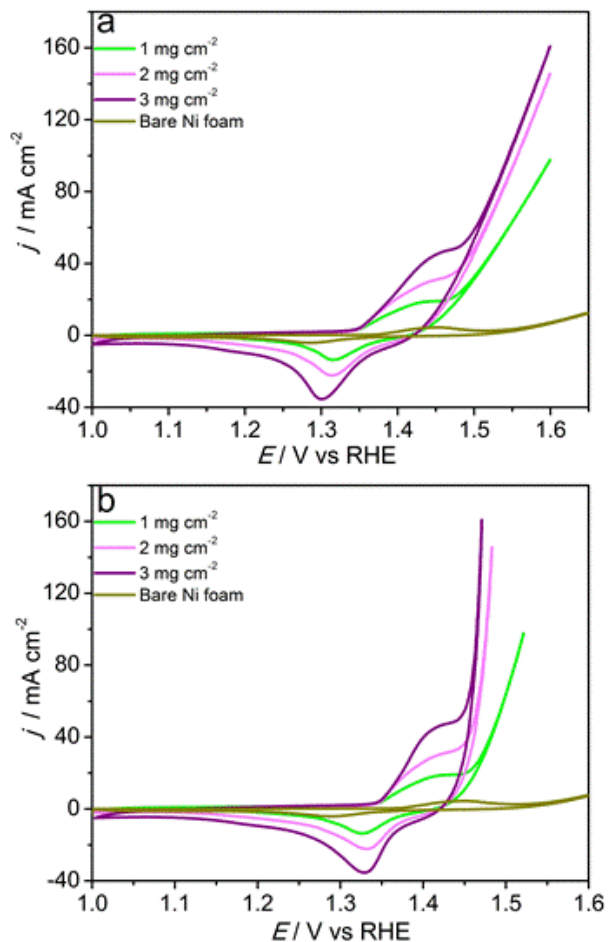

**Figure S18.** Cyclic voltammograms (scan rate  $0.005 \text{ V s}^{-1}$ ) for oxidation of stirred 1 M KOH with a nickel foam electrode that was unmodified (*tan*), or coated with 1.0 (*light green*), 2.0 (*pink*) or 3.0  $\text{mg cm}^{-2}$  (*purple*) of  $\text{Ni}_{0.75}\text{Fe}_{0.25}\text{S}_{2+y}$  synthesised using a microwave method at  $150^\circ\text{C}$ . Panel (a) shows raw experimental data normalised to the geometric surface area of the electrode, and panel (b) shows data that were post-corrected for  $IR_u$ -drop ( $R_u = 0.5 \Omega$ ).

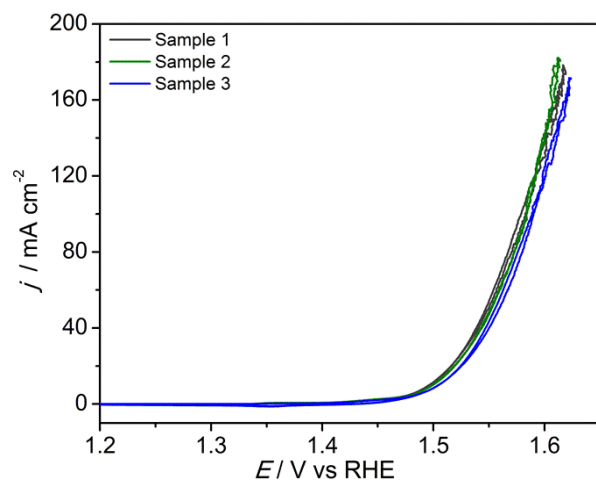

**Figure S19.** Cyclic voltammograms (scan rate  $0.005 \text{ V s}^{-1}$ ) for oxidation of stirred 1 M KOH catalysed by three independent samples of  $\text{Ni}_{0.75}\text{Fe}_{0.25}\text{S}_{2+y}$  each synthesised using a microwave method at  $150^\circ\text{C}$ . Catalysts were immobilised on a glassy-carbon electrode at  $\Gamma = 0.28 \text{ mg cm}^{-2}$ . Currents are normalised to the geometric area of the electrode. Data were post-corrected for  $IR_u$  losses ( $R_u = 13\text{-}15 \Omega$ ).
